# Supplementary material
Source: Elsevier journal article supplement (https://www.sciencedirect.com/science/article/pii/S0213911117302170)
Supplement: mmc1 [file S0213911117302170:mmc1.docx]

**Apéndice**

**Artículos incluidos en la revisión (número de referencia en el artículo)**

5. Coutinho JG, Gentil PC, Toral N. A desnutrição e obesidade no Brasil: o enfrentamento com base na agenda única da nutrição. Cad Saúde Pública. 2008;24(Supl 2):332-40.

7. Jaime PC, Silva ACS, Lima AMC, et al. Ações de alimentação e nutrição na atenção básica: a experiência de organização no Governo Brasileiro. Rev Nutr. 2011;24:809-24.

1. Aires JS, Martins MC, Joventino ES, et al. (In) segurança alimentar em familias de pré-escolares de uma zona rural do Ceará. Acta Paul Enferm. 2012;25:102-8.
2. Alvarenga MRM, Oliveira MAC, Faccenda O, et al. Evaluation of the nutritional risk in elderly assisted by family health teams. Rev Esc Enferm. 2010;44:1046-51.
3. Alves CRL, Santos LC, Goulart LMHF, et al. Alimentação complementar em crianças no segundo ano de vida. Rev Paul Pediatr. 2012;30:499-506.
4. Amer NM, Marcon SS, Santana RG. Body mass index and hypertension in adult subjects in Brazil’s midwest. Arq Bras Cardiol. 2011;96:47-53.
5. Andrade KA, Toledo MTT, Lopes MS, et al. Counseling regarding healthy lifestyles in primary healthcare and the dietary practices of clients. Rev Esc Enferm. 2012;46:1117-24.
6. Anunciação PC, Ribeiro RC, Pereira MQ, et al. Different measurements of waist circumference and sagittal abdominal diameter and their relationship with cardiometabolic risk factors in elderly men. J Human Nutr Dietetics. 2014;27:162-7.
7. Arimura ST, Moura BM, Pimentel GD, et al. Waist circumference is better associated with high density lipoprotein (HDL-c) than with body mass index (BMI) in adults with metabolic syndrome. Nutr Hosp. 2011;26:1328-32.
8. Azeredo CM, Cotta RMM, Sant’Ana SCC, et al. Efetividade superior do esquema diário de suplementação de ferro em lactentes. Rev Saude Publica. 2010;44:230-9.
9. Badalotti TS, Weigert KL, Bos ÂJG. Efeito de um programa de educação em saúde no perfil de saúde bucal de pré-escolares: uma experiência na rede pública de Porto Alegre, Brasil. Rev Bras Promoç Saúde. 2013;26:102-9.
10. Bezerra TA, Pedraza DF. (In)segurança alimentar entre famílias com crianças menores de cinco anos residentes em área de vulnerabilidade social de Campina Grande, Paraíba. Rev Nutr. 2015;28:655-65.
11. Brandão DS, Venancio SI, Giugliani ERJ. Association between the Brazilian Breastfeeding Network implementation and breastfeeding indicators. J Pediatr. 2015;91:143-51.
12. Broilo MC, Louzada ML, Drachler ML, et al. Maternal perception and attitudes regarding healthcare professionals’ guidelines on feeding practices in the child's first year of life. J Pediatr. 2013;89:485-91.
13. Bubach S, Oliveira ERA. Associação entre o controle da pressão arterial e o estado nutricional em hipertensos. Rev Enferm UERJ. 2013;19:415-9.
14. Buccini GS, Benício MHD, Venancio SI. Determinants of using pacifier and bottle feeding. Rev Saude Publica. 2014;48:571-82.
15. Camossa ACA, Telarolli Jr R, Machado MLT. O fazer teórico-prático do nutricionista na estratégia saúde da família: representações sociais dos profissionais das equipes. Rev Nutr. 2012;25:89-106.
16. ENFAC Working Group. Effect of providing multiple micronutrients in powder through primary health care on anemia in young Brazilian children: a multicentre pragmatic controlled trial. PLoS One. 2016;11:e0151097.
17. Carvalhaes MABL, Gomes CB, Malta MB, et al. Prepregnancy overweight is associated with excessive weight gain during pregnancy. Rev Bras Ginecol Obstet. 2013;35:523-9.
18. Carvalho AT, Almeida ER, Nilson EAF, et al. Situação nutricional de crianças menores de cinco anos em municípios do Nordeste Brasileiro. J Human Growth Develop. 2014;24(2).
19. Chaffee BW, Feldens CA, Vítolo MR. Cluster-randomized trial of infant nutrition training for caries prevention. J Dent Research. 2013;92(7 Suppl):29S-36S.
20. Costa LR, Daher A, Queiroz MG. Early childhood caries and body mass index in young children from low income families. Int J Environ Res Public Health. 2013;10:867-78.
21. Costa MCD, Barreto ADC, Bleil RAT, et al. Estado nutricional de adolescentes atendidos em uma unidade de referência para adolescentes no município de Cascavel, estado do Paraná, Brasil. Epidemiol Serv Saúde. 2011;20:355-61.
22. Deus RM, Mingoti SA, Jaime PC, et al. Impacto de intervenção nutricional sobre o perfil alimentar e antropométrico de usuárias do Programa Academia da Saúde. Cienc Saúde Coletiva. 2015;20:1937-46.
23. Duarte LS, Fujimori E, Toriyama ATM, et al. Brazilian maternal weight perception and satisfaction with toddler body size: a study in primary health care. J Pediatr Nurse. 2016;31:490-7.
24. Facchini LA, Nunes BP, Motta JVS, et al. Insegurança alimentar no Nordeste e Sul do Brasil: magnitude, fatores associados e padrões de renda per capita para redução das iniquidades. Cad Saúde Pública. 2014;30:161-74.
25. Faria HTG, Santos MA, Arrelias CCA, et al. Adesão ao tratamento em diabetes mellitus em unidades da Estratégia Saúde da Família. Rev Esc Enferm. 2014;48:257-63.
26. Ferreira MCS, Detregiachi CRP, Oliveira MRM. Qualidade das medidas de peso produzidas em unidades de atenção básica à saúde da região de Botucatu-SP, Brasil. Rev Soc Bras Aliment Nutr. 2011;36:27-36.
27. Ferreira PM, Papini SJ, Corrente JE. Diversity of eating patterns in older adults: a new scenario? Rev Nutr. 2014;27:67-79.
28. Figueiredo RCD, Snoek FJ, Barreto SM. Do patients and physicians agree on diabetes management? A study conducted in public healthcare centres in Brazil. Patient Educ Couns. 2013;92:107-13.
29. Florindo AA, Brownson RC, Mielke GI, et al. Association of knowledge, preventive counseling and personal health behaviors on physical activity and consumption of fruits or vegetables in community health workers Health behavior, health promotion and society. BMC Public Health. 2015;15:1-8.
30. Fontbonne A, Cesse EAP, Sousa IMC, et al. Risk factor control in hypertensive and diabetic subjects attended by the Family Health Strategy in the State of Pernambuco, Brazil: the SERVIDIAH study. Cad Saúde Pública. 2013;29:1195-204.
31. Freitas LC, Rodrigues GM, Araujo FC, et al. Perfil dos hipertensos da Unidade de Saúde da Família Cidade Nova 8, município de Ananindeua-PA. RBMFC. 2012;7:13-9.
32. Freitas LJQ, Melo NCCC, Valente MMQP, et al. Amamentação ineficaz entre nutrizes atendidas em unidades básicas de saúde. Rev Enferm UERJ. 2014;22:103-10.
33. Gadenz SD, Benvegnú LA. Eating habits in the prevention of cardiovascular diseases and associated factors in elderly hypertensive individuals. Cien Saude Coletiva. 2013;18:3523-33.
34. Girotto E, Andrade SM, Cabrera MAS. Prevalência de obesidade abdominal em hipertensos cadastrados em uma Unidade de Saúde da Família. Arq Bras Cardiol. 2010;94:754-62.
35. Gomes CB, Malta MB, Martiniano ACA, et al. Práticas alimentares de gestantes e mulheres não grávidas: há diferenças? Rev Bras Ginecol Obstetr. 2015;37:325-32.
36. Hidalgo KD, Mielke GI, Parra DC, et al. Health promoting practices and personal lifestyle behaviors of Brazilian health professionals. BMC Public Health. 2016;16:1114.
37. Horta PM, Lopes AC, Caroline L, et al. Dietary quality maintained among overweight Brazilian women enrolled in a primary healthcare service. J Health Popul Nutr. 2014;32:608-14.
38. Jaime PC, Silva AC, Gentil PC, et al. Brazilian obesity prevention and control initiatives. Obes Rev. 2013;14(Suppl 2):88-95.
39. Jacondino CB, Closs VE, Gomes I, et al. Adesão à dieta por idosos com síndrome metabólica assistidos na Estratégia Saúde da Família: frequência e associação com depressão. Sci Med. 2016;26:ID229856.
40. Jesus MCP, Santos SMR, Goulart TP, et al. Atualização dos dados nos sistemas de informação em saúde. Ver Enferm UERJ. 2013;20:795-801.
41. Jung NM, Bairros FS, Neutzling MB. Utilização e cobertura do Sistema de Vigilância Alimentar e Nutricional no Estado do Rio Grande do Sul, Brasil. Ciên Saúde Coletiva. 2014;19:1379-88.
42. Laporte-Pinfildi ASC, Zangirolani LTO, Spina N, et al. Atenção nutricional no pré-natal e no puerpério: percepção dos gestores da atenção básica à saúde. Rev Nutr. 2016;29:109-23.
43. Lima LA, Nedel FB, Olinto MTA, et al. Food habits of hypertensive and diabetics cared for in a primary health care service in the South of Brazil. Rev Nutr. 2015;28:197-206.
44. Lima STRM, Souza BS, França AK, et al. Reductions in glycemic and lipid profiles in hypertensive patients undergoing the Brazilian Dietary Approach to Break Hypertension: a randomized clinical trial. Nutrition Research. 2014;34:682-7.
45. Lindeman IL, Oliveira RR, Mendonza-Sassi RA. Dificuldades para alimentação saudável entre usuários da atenção básica em saúde e fatores associados. Cien Saúde Coletiva. 2016;21:599-610.
46. Lopes ACS, Toledo MTT, Câmara AMCS, et al. Condições de saúde e aconselhamento sobre alimentação e atividade física na atenção primária à saúde de Belo Horizonte-MG. Epidemiol Serv Saúde. 2014;23:305-16.
47. Machado CH, Carmo AS, Horta PM, et al. Efetividade de uma intervenção nutricional associada à prática de atividade física. Cad Saúde Coletiva. 2013;21:148-53.
48. Malta DC, Dimech CPN, Moura L, et al. Balanço do primeiro ano da implantação do Plano de Ações Estratégicas para o enfrentamento das doenças crônicas não transmissíveis no Brasil, 2011 a 2022. Epidemio. Serv Saúde. 2013;22:171-8.
49. Malta MB, Carvalhaes MA, Takito MY, et al. Educational intervention regarding diet and physical activity for pregnant women: changes in knowledge and practices among health professional. BMC Pregnancy and Childbirth. 2016;16:175.
50. Mariath AB, Giachini RM, Lauda LG, et al. Estado de ferro e retinol sérico entre crianças e adolescentes atendidos por equipe da Estratégia de Saúde da Família de Itajaí, Santa Catarina. Ciênc Saúde Coletiva. 2010;15:509-16.
51. Marinho NBP, Vasconcelos HCA, Alencar AMPG, et al. Risk for type 2 diabetes mellitus and associated factors. ACTA Paul Enferm. 2013;26:569-74.
52. Marinho NBP, Vasconcelos HCA, Alencar AMPG, et al. Diabetes mellitus: fatores associados entre usuários da estratégia saúde da família. Acta Paul Enferm. 2012;25:595-600.
53. Marques ES, Cotta RMM, Franceschini SCC, et al. Práticas e percepções acerca do aleitamento materno: consensos e dissensos no cotidiano de cuidado numa unidade de saúde da família. Physis. 2009;19:439-55.
54. Martins MV, Ribeiro AQ, Martinho KO, et al. Anthropometric indicators of obesity as predictors of cardiovascular risk in the elderly. Nutr Hosp. 2015;31:2583-9.
55. Menezes MC, Mingoti SA, Cardoso CS, et al. Intervention based on transtheoretical model promotes anthropometric and nutritional improvements - a randomized controlled trial. Eat Behav. 2015;17:37-44.
56. Moraes AL, Almeida EC, Souza LB. Perceptions of depressed obese people about the factors associated with the maintenance of their obesity: an investigation in a family health program in Rio de Janeiro city. Physis. 2013;23:553-72.
57. Niquini RP, Bittencourt SA, Lacerda EMA, et al. User embracement and maternal characteristics associated with liquid offer to infants. Rev Saude Publica. 2010;44:677-85.
58. Niquini RP, Bittencourt SA, Lacerda EMA, et al. Avaliação do processo da assistência nutricional no pré-natal em sete unidades de saúde da família do Município do Rio de Janeiro. Ciên Saúde Coletiva. 2012;17:2805-16.
59. Oliveira CSM, Augusto RA, Muniz PT, et al. Anemia e deficiência de micronutrientes em lactentes atendidos em unidades básicas de saúde em rio Branco, acre, Brasil. Cien Saúde Coletiva. 2016;21:517-29.
60. Oliveira FCC, Cotta RMM, Sant’Ana LFR, et al. Programa Bolsa Família e estado nutricional infantil: desafios estratégicos. Cien Saude Coletiva. 2011;16:3307-16.
61. Oliveira T, Marquitti FD, Carvalhaes MABL, et al. Desenvolvimento de um Questionário Quantitativo de Freqüência Alimentar (QQFA) para gestantes usuárias de unidades básicas de saúde de Ribeirão Preto, São Paulo, Brasil. Cad Saude Publica. 2010;26:2296-306.
62. Oliveira CB, Frechiani JM, Silva FM, et al. As ações de educação em saúde para crianças e adolescentes nas unidades básicas da região de Maruípe no município de Vitória. Ciênc Saúde Coletiva. 2009;14:635-44.
63. Paiva AA, Cagliari MPP, Queiroz D, et al. Programa Nacional de Suplementação de Vitamina A no estado da Paraíba: uma análise a partir do relato de profissionais da equipe de saúde da família. Epidemiol Serv Saúde. 2011;20:373-83.
64. Palombarini AF, Malta MB, Parada CMGL, et al. Nutritional practices of expectant mothers supported by a family health unit: an exploratory study. Online Brazilian Journal of Nursing. 2014;13:186-97.
65. Passanha A, Benício MHD, Venâncio SI, et al. Implantacao da Rede Amamenta Brasil e prevalencia de aleitamento materno exclusivo. Rev Saude Publica. 2013;47:1141-8.
66. Peixoto MRG, Ramos K, Martins KA, et al. Insegurança alimentar na área de abrangência do Núcleo de Apoio à Saúde da Família em Itumbiara, Goiás. Epidemiol Serv Saúde. 2014;23:327-36.
67. Pellegrine JB, Koopmans FF, Pessanha HL, et al. Educação popular em saúde: doação de leite humano em comunidade do Rio de Janeiro, Brasil. Interface Comun Saúde Educ. 2014;18(Supl 2):1499-506.
68. Pereira SMPD, Brito LAMH, Palácio MAV, et al. Operacionalização do sistema de vigilância alimentar e nutricional em Juazeiro do Norte, Ceará. Rev Baiana Saúde Pública. 2013;36:577-86.
69. Pimentel VRM, Sousa MF, Hamann EM, et al. Alimentação e nutrição na Estratégia Saúde da Família em cinco municípios brasileiros. Ciênc Saúde Coletiva. 2014;19:49-58.
70. Queluz MC, Pereira MJB, Santos CB, et al. Prevalência e determinantes do aleitamento materno exclusivo no município de Serrana, São Paulo, Brasil. Rev Esc Enferm USP. 2012;46:537-43.
71. Raizel R, Silva VG, Godois AM, et al. Comportamentos de risco à saúde de adolescentes e atividades educativas da Estratégia Saúde da Família em Cuiabá, Mato Grosso, 2011. Epidemiol Serv Saude. 2016;25:291-9.
72. Reis RS, Franceschini SCC, Cotta RMM, et al. Perfil sociossanitário, gestacional e de aleitamento materno das gestantes cadastradas nas unidades de atenção primária à saúde de Viçosa-MG. Rev Méd Minas Gerais. 2011;21(3).
73. Ribeiro AG. Hypertension and educational home visits: the strategic role of family healthcare. Rev Nutr. 2012;25:271-82.
74. Ribeiro AG, Cotta RMM, Ribeiro SMR, et al. Representações sociais de mulheres portadoras de hipertensão arterial sobre sua enfermidade: desatando os nós da lacuna da adesão ao tratamento na agenda da Saúde da Família. Physis (Rio J). 2011;21:87-112.
75. Ribeiro AG, Ribeiro SM, Dias CM, et al. Non-pharmacological treatment of hypertension in primary health care: a comparative clinical trial of two education strategies in health and nutrition. BMC Public Health. 2011;11:637.
76. Ricardi LM, Sousa MF. Educação permanente em alimentação e nutrição na Estratégia Saúde da Família: encontros e desencontros em municípios brasileiros de grande porte. Ciênc Saúde Coletiva. 2015;20:209-18.
77. Rocha ACD, Pedraza DF. Acompanhamento do crescimento infantil em unidades básicas de saúde da família do município de Queimadas, Paraíba, Brasil. Texto & Contexto Enferm. 2013;22:1169-78.
78. Romagna ES, Silva MCA, Ballardin PAZ. Prevalência de sobrepeso e obesidade em crianças e adolescentes de uma unidade básica de saúde em Canoas, Rio Grande do Sul, e comparação do diagnóstico nutricional entre os gráficos do CDC 2000 e da OMS 2006. Sci Med. 2010;20:228-31.
79. Sanches MTC, Buccini GS, Gimeno SGA, et al. Fatores associados à interrupção do aleitamento materno exclusivo de lactentes nascidos com baixo peso assistidos na atenção básica. Cad Saude Publica. 2011;27:953-65.
80. Silva AMLV, Taquette SR, Hasselmann MH. Family violence and body mass index among adolescents enrolled in the Bolsa Família Program and treated at a primary care clinic. Cad Saude Publica. 2014;30:645-55.
81. Silva DAS. Overweight and obesity in five- to ten-year-old children benefited from Bolsa Família Program in the State of Sergipe, Brazil. Rev Paul Pediatr. 2011;29:529-35.
82. Silva EP, Lima RT, Ferreira NLS, et al. Pré-natal na atenção primária do município de João Pessoa-PB: caracterização de serviços e usuárias. Rev Bras Saúde Matern Infant. 2013;13:29-37.
83. Silva LLS, Peixoto MRG, Hadler MCCM, et al. Estado nutricional de vitamina A e fatores associados em lactentes atendidos em unidades básicas de saúde de Goiânia, Goiás, Brasil. Rev Bras Epidemiol. 2015;18:490-502.
84. Silva NA, Menezes TN, Melo RLP, et al. Handgrip strength and flexibility and their association with anthropometric variables in the elderly. Rev Assoc Med Bras. 2013;59:128-35.
85. Silva SM, Facchini LA, Tomasi E, et al. Recebimento de orientação sobre consumo de sal, açúcar e gorduras em adultos: um estudo de base nacional. Rev Bras Epidemiol. 2013;16:995-1004.
86. Soares LDA, Campos FACS, Araujo MGR, et al. Análise do desempenho motor associado ao estado nutricional de idosos cadastrados no Programa Saúde da Família, no município de Vitória de Santo Antão-PE. Ciên Saúde Coletiva. 2012;17:1297-304.
87. Sotero AM, Cabral PC, Silva GAP. Fatores socioeconomicos, culturais e demograficos associados ao padrão alimentar de lactentes. Rev Paul Pediatr. 2015;33:445-52.
88. Sousa EL, Silva EN, Silva FW, et al. Eating habits: knowledge of pregnant teenagers assisted in primary care. Rev Pesqui Cuid Fundam (Online). 2013;5:661-70.
89. Squarcini CFR, Jesus GM, Petroski EL. Ficha antropométrica nos Núcleos de Apoio à Saúde da Família: potencialidades e obstáculos. Rev Bras Cineantropom Desempenho Hum. 2015;17:248-55.
90. Stephan AMS, Cavada MN, Vilela CZ. Prevalência de aleitamento materno exclusivo até a idade de seis meses e características maternas associadas, em área de abrangência de unidade de Saúde da Família no município de Pelotas, Estado do Rio Grande do Sul, Brasil, 2010. Epidemiol Serv Saúde. 2012;21:431-8.
91. Szwarcwald CL, Souza Jr PEB, Damacena GN, et al. Recomendações e práticas dos comportamentos saudáveis entre indivíduos com diagnóstico de hipertensão arterial e diabetes no Brasil: Pesquisa Nacional de Saúde (PNS), 2013. Rev Bras Epidemiol. 2015;18(Supl 2):132-45.
92. Torres HC, Reis IA, Roque C, et al. Monitoramento telefônico como estrategia educativa para o autocuidado das pessoas com diabetes na atenção primária. Cienc Enferm. 2013;19:95-105.
93. Trevisani JJD, Jaime PC. Acompanhamento das condicionalidades da saúde do Programa Bolsa Família: estudo de caso no Município do Rio de Janeiro-RJ, Brasil, em 2008. Epidemiol Serv Saúde. 2012;21:385-94.
94. Vasconcelos ACCP, Magalhães R. Práticas educativas em segurança alimentar e nutricional: reflexões a partir da experiência da Estratégia Saúde da Família em João Pessoa, PB, Brasil. Interface. 2016;20:99-110.
95. Vasconcelos IAL, Sousa MF, Santos LMP. Evolução do quantitativo de nutricionistas na atenção básica do Brasil: a contribuição dos Núcleos de Apoio à Saúde da Família e da Estratégia Saúde da Família de 2007 a 2013. Rev Nutr. 2015;28:431-50.
96. Venâncio SI, Martins MCN, Sanches MTC, et al. Análise de implantação da Rede Amamenta Brasil: desafios e perspectivas da promoção do aleitamento materno na atenção básica. Cad Saude Publica. 2013;29:2261-74.
97. Venancio SI, Giuliani ERJ, Stefanello OLO, et al. Associação entre o grau de implantação da Rede Amamenta Brasil e indicadores de amamentação. Cad Saúde Pública. 2016;32:e00010315.
98. Veras VS, Santos MA, Rodrigues FFL, et al. Autocuidado de pacientes inseridos em um programa de automonitorização da glicemia capilar no domicílio. Rev Gaúcha Enferm. 2014;35:42-8.
99. Vítolo MR, Bueno MSF, Gama CM. Impacto de um programa de orientação dietética sobre a velocidade de ganho de peso de gestantes atendidas em unidades de saúde. Rev Bras Ginecol Obstet. 2011;33:13-9.
100. Winkelmann ER, Fontela PC. Condições de saúde de pacientes com diabetes mellitus tipo 2 cadastrados na Estratégia Saúde da Família, em Ijuí, Rio Grande do Sul, 2010-2013. Epidemiol Serv Saúde. 2014;23:665-74.
101. Yoshida VC, Andrade MGG. O cuidado à saúde na perspectiva de trabalhadores homens portadores de doenças crônicas. Interface Comun Saúde Educ. 2016;20:597-610.
