# Supplementary material
Source: Elsevier journal article supplement (https://www.sciencedirect.com/science/article/pii/S0213911117302170)
Supplement: mmc2 [file S0213911117302170:mmc2.docx]

Apéndice – Descripción de las acciones de alimentación y nutrición

| **Tema** | **Subtema** | **Descripción de las acciones** | | **Otras Informaciones** |
| --- | --- | --- | --- | --- |
| Gestión de las acciones de AyN | Divulgación de las acciones de gestión federal | *Sugerencia de agenda única de nutrición:* Enfocada en el ciclo vital y con posibilidad de ampliación de su alcance en la ESF por medio de la institución de los Núcleos de Apoyo a la Salud de la familia. Acciones descritas:  *Evaluación y monitoreo del estado nutricional*: Por medio de la caracterización del perfil epidemiológico, de la situación de salud y de la AyN, a partir del registro de datos del Sistema de Vigilancia Alimentaria y Nutricional (SISVAN) en todas las fases del ciclo vital; utilización del protocolo SISVAN; orientaciones para atención nutricional en los servicios de APS; organización de los protocolos de atención; atención prenatal para las embarazadas y acompañamiento de crecimiento y desarrollo de los niños hasta los dos años de edad; seguimiento prioritario en la atención de las familias beneficiarias del programa de transferencia de ingresos (Bolsa Familia).  *Prevención y control de enfermedades y daños relacionados con la AyN*: Por medio de la suplementación com micronutrientes para los grupos más vulnerables y educación alimenticia y nutricional en el servicio de salud a partir de las guías alimentares y la articulación de acciones intersectoriales.  *Promoción de salud y alimentación adecuada y saludable:* Por medio de incentivos y apoyo para la adopción de hábitos alimenticios saludables y para la práctica de actividad física; de promoción de la lactancia materna exclusiva hasta el sexto mes de edad y alimentación complementaria hasta el segundo año de vida. | | Prerrevisión de la  Politica de Alimentación y Nutrición (2008)5 |
| Se dio priorización y fortalecimiento de la APS por parte de la gestión. Se sugirió la consolidación de la APS para que tuviera consecuencias positivas en el avance y la implementación de acciones de AyN. Acciones descritas:  *Vigilancia alimentaria y nutricional:* Por medio de registro de datos alimenticios y nutricionales en los sistemas de información disponibles; realización de estrategias como el diagnóstico nutricional en las campañas de vacunación; uso del SISVAN para la planificación, acompañamiento y evaluación.  *Prevención y control de daños relacionados a la AyN:* por medio de la suplementación de hierro y vitamina A; educación alimenticia y nutricional; atención integral con acompañamiento interdisciplinario individual y en grupos; consejería nutricional; definición de metas nutricionales individuales de acuerdo con el estado de motivación; atención nutricional en el domicilio.  *Promoción de salud y de la alimentación adecuada y saludable*: Por medio de inserción a la rutina del servicio de salud; promoción de lactancia materna y de la alimentación complementaria saludable; uso de recomendaciones de guías alimentarias y orientación alimenticia y nutricional valorizando los alimentos regionales y los aspectos culturales de la alimentación; realización de asociaciones intersectoriales; estímulo a la oferta y distribución de alimentos saludables a las familias del Programa Bolsa Familia; educación sanitaria a los pequeños comerciantes y merenderos; estímulo y apoyo para la inclusión de PAAS en proyectos políticos y pedagógicos; promoción y la creación de huertas escolares y comunitarias; incentivo a los talleres de cocina en las escuelas; y implementación de acciones del Programa “Salud en la Escuela” y “Gimnasio de la salud”.  *Realización de acciones en los Núcleos de Apoyo a la Salud de la Familia:* diagnóstico, planificación e implementación de acciones de AyN; elaboración, revisión, adaptación y definición de los protocolos de atención nutricional; y articulación intersectorial en el territorio y apoyo a la organización de flujos para programas de protección social. | | Posrevisión de la  Política de Alimentación y Nutrición (2011-2013) 7,68,78 |
| Fuerza de trabajo | Cantidad de nutricionistas | Se aumentó de número de nutricionistas en 176% en la ESF, 75% en las unidades de salud tradicionales entre 2007 y 2013 y el 657% en los Núcleos de Apoyo de Salud a la Familia entre 2008 y 2013, con contrataciones principalmente en municipios pequeños de la región nordeste y con un Índice de Desarrollo Humano (IDH) medio. La media de profesionales por municipio se mantuvo igual y menos de 15% permanecieron en su cargo más de cinco años. 125 | Datos del Registro Nacional de Establecimientos de Salud 125 |
| Trabajo de los nutricionistas y profesionales de la APS en AyN | *Funciones del nutricionista*: La prevención de enfermedades, promoción de la salud, prescripción de dietas y acciones educativas.  *Abordaje del tema por los equipos:* orientaciones normativas y basadas en el escaso conocimiento técnico sobre el tema.  *Nutricionistas en el equipo mínimo de la ESF:* Fue sugererida la inclusión de nutricionistas por algunos grupos y se atribuyó su ausencia al modelo médico-hegemónico, a la falta de reconocimiento y de recursos financieros, así como al desconocimiento sobre la profesión. Otros profesionales consideraron como suficiente la presencia del nutricionista para apoyo y las remisiones 45. | Local/Año: São Carlos/São Paulo – 2008-2009  Datos: Entrevista con 21 profesionales de la ESF, 6 residentes y 1 gestora  Año: 2008-09 |
|  | Fuerza de trabajo | Educación permanente en la ESF | *Facilitadores para la realización en las ESF*: Se realizaron vínculos con otras instituciones, se promovió la adhesión de los profesionales y la formación de tutores de la Red Amamanta Brasil. Se garantizó la existencia de recursos financieros y del sector destinados a la educación permanente.  *Obstáculos:* Falta de disponibilidad de tiempo de los profesionales, falta de priorización, falta de estrategias estructuradas de educación permanente, así como de infraestructura y de recursos humanos, especialmente de nutricionistas. Rotación de profesionales. Poca adhesión especialmente por parte de los de médicos y burocracia para el uso de los recursos.  *Principales estrategias:* Se desarrollaron acciones locales. Se planificaron y programaron actividades basadas en las necesidades y actividades en grupos. Se realizó evaluación y acompañamiento de las acciones con subsidio teórico, técnico y *feedback* para los profesionales.  Se reportó baja educación continua organizada, se realizaban principalmente acciones puntuales sobre temas específicos106. | Local/Año: 28 municipios de gran tamaño – 2008-2010  Datos: entrevista con 44 coordinadores de AyN |
| Descrip ción y alcance de las acciones desar  rolladas | Desarrollo de acciones de AyN | *Dificultades:* Resistencia a los cambios de hábitos alimenticios e influencia de los medios de comunicación. Falta de conocimiento técnico, falta de auxilio de nutricionistas y de articulación entre los equipos y los gestores en aspectos sociales, económicos y culturales.  *Potencialidad:* La inclusión de nutricionistas en los equipos. Acciones multidisciplinarias de educación alimentaria desde la infancia con las familias y en las escuelas. Espacio físico adecuado. Desburocratización. Nombramiento de gestores desvinculados con la política. Articulación entre profesionales. Disponibilidad de tiempo para atención y planificación de acciones de la PNAN99. | | Local/Año: 5 municipios de gran tamaño – 2009-2010  Datos: grupos focales con 60 profesionales de la ESF en 5 municipios |
| Desarrollo de las acciones de Seguridad Alimentaria Nutricional | Se realizaron actividades educativas fragmentadas y descontinuadas, con temas desagregados en diversos frentes.  *Obstáculos para los profesionales:* Falta de apoyo de la gestión y de tiempo. Rotación de profesionales. Falta de conocimiento sobre el tema. Las condiciones socioeconómicas locales. Formación distante de la realidad y usuarios resistentes al cambio.  *Obstáculos para los usuarios*: Eran recomendados alimentos con costos elevados. Uso de abordajes que no consideran la complejidad de la alimentación. Influencia de los medios de comunicación y limitado acceso a las tiendas y mercados.  *Sugerencias:* Redefinición del número de familias por equipo. Realización de actividades de cocina y huertas. Creación de asociación con escuelas y guarderías. Educación permanente y uso de abordajes participativos. Inserción de nutricionistas en los equipos. Realización de actividades en periodos adecuados para los usuarios con ampliación de espacios de participación popular124. | | Local/Año: João Pessoa/ Paraíba – 2012  Datos: observación y 34 entrevistas con personal de apoyo, profesionales y usuarios y 1 Unidad Básica de Salud. |
| Asistencia al control del embarazo | Se contó con Unidades de Salud con equipamientos, materiales, medicamentos y suplementos necesarios. Se presentó baja cobertura de mujeres en edad fértil y alta cobertura a mujeres embarazadas. Se realizaron controles del embarazo y uso de suplementos. Hubo baja participación en actividades de educación en salud112. | | Local/Año: João Pessoa/Paraíba - 2008  Datos: entrevistas con 239 usuarias; evaluación de 44 Unidades Básicas de Salud. |
| Se reportó control y registro de la presión arterial y de peso, prescripción de suplementos y realización de exámenes rutinarios de sangre, sin embargo hubo bajo registro de la estatura, del peso inicial, presencia de edema, Índice de Masa Corporal (IMC) y resultados de los exámenes. Se reportó falta de orientaciones sobre alimentación, ganancia de peso y uso de sulfato ferroso88. | | Local/Año: Rio de Janeiro/ Rio de Janeiro - 2008  Datos: entrevistas con 130 embarazadas y verificación de carnet de control del embarazo; 7 Unidades Básicas de Salud |
| Hubo escasa disponibilidad de la balanza portátil en las Unidades Básicas de Salud, aunque los demás equipos estaban presentes en el 89%. La frecuencia de mantenimiento de los equipos fue deficiente/regular en el 78,5%. La mayoría de las Unidades Básicas contaron con la existencia y utilización de los materiales. Hubo insuficiente inserción de nutricionistas en la red, con mayor conformidad para las Unidades Básicas de Salud en relación a las Unidades de Salud de la Familia. Se aplicaron procedimientos de identificación del riesgo nutricional, medición de la estatura, consulta nutricional rutinaria en el control del embarazo y suplementación de rutina. Una baja proporción de Unidades de Salud realizaban consulta nutricional en el control del embarazo, así como adecuación del acompañamiento del estado nutricional; menos del 50% evaluaban la alimentación de la puérpera72. | | Local/Año: Baixada Santista/São Paulo - 2012  Datos: entrevista con 28 gestores; 19 Unidades Básicas de Salud y 9 Unidades de Salud de la Familia |
| Acompaña  miento del crecimiento infantil | El 20% de las Unidades Básicas de Salud no tenían su equipo de salud completo, apenas el 6,2% no contaba con apoyo de nutricionistas (Núcleos de Apoyo a la Salud de la Familia). Todas las Unidades tenían equipos antropométricos, más del 60% de los enfermeros afirmaron no haber recibido entrenamiento sobre el tema y el 75% basaban su conducta en protocolos. Se realizó registro de peso y de estatura observado en más del 60% de los casos, el 82,4% de las cartillas tenían por lo menos dos marcas en el gráfico del peso por edad. Hubo niños con bajo peso al nacer sin atención especial en relación a los de peso adecuado107. | | Local/Año: Queimadas/ Paraíba - 2011  Datos: entrevistas con madres de 204 niños y enfermeros; 16 Unidades Básicas de Salud |
| Requerimientos de salud del Programa Bolsa Familia | La mayoría de las Unidades realizaba control del embarazo, registro del peso y estatura y realizaban consultas individuales para niños, también realizaban acompañamiento del crecimiento y desarrollo, así como la evaluación del estado nutricional. El 65,6% intervenían en el riesgo nutricional, el 85% realizaban acciones de promoción de la lactancia materna. En el 48,4% de las Unidades se contaba con grupos educativos. El 73,4% controlaban el peso y la estatura de las mujeres. El 84,3% realizaban acciones de control de diabetes e hipertensión. El 73,8% de las consultas individuales se realizaban en adolescentes y el 57,8% en otros miembros de la familia. El 53,1% de las Unidades promovían la articulación intersectorial y el 17,2% participaban en foros de gestión123. | | Local/Año: Rio de Janeiro/ Rio de Janeiro - 2008  Datos: evaluación de 128 Unidades Básicas de Salud |
| Diagnós tico  alimentario y nutricio nal | Realización del diagnóstico | El 80% de los artículos presentaban evaluación del estado nutricional por medio del registro de medidas antropométricas colectadas o referidas por los usuarios, también tenian reporte del consumo alimenticio y consideraban aspectos clínicos y bioquímicos identificados a partir de entrevistas estructuradas o semiestructuradas, así como factores socioeconómicos y demográficos relacionados o estratificados con una o más variables referidas. En tres de los artículos se evaluaron aspectos subjetivos y culturales además de los mencionados anteriormente. Fueron utilizadas variables relacionadas con los hábitos de vida y la escala para el diagnóstico de inseguridad alimenticia y nutricional y se realizó diagnóstico exclusivo de cuestiones subjetivas relacionadas a las AyN. Un artículo describió la calidad de las medidas de peso en las Unidades Básicas de Salud. | | Descripción de los resultados de diversos artículos. La mayoría fue desarrollada puntualmente para la realización del estudio. |
| Apoyo al Diagnóstico | Uso/ Operacionalización del SISVAN | Se reportaron diez coordinaciones regionales de salud (CRS) con porcentuales de uso del SISVAN* entre 60 y 80%, 17 con cobertura de hasta el 2,5%. La mayor cobertura ocurrió entre niños de 0 y 5 años y de 5 y 10 años, aunque la mayoría estuvo abajo del 10%. Entre los adolescentes, adultos y adultos mayores, la cobertura fue menor del 3% para casi todas las CRS. Con relación a la población adulta, las mujeres representaron más del 80% de los acompañamientos  *Uso del SISVAN: municipios que cargaban datos de por lo menos una persona71. | Local/Año: Rio Grande do Sul - 2010  Datos: evaluación de datos de 19 CRS |
| *Zona da Mata/MG:* La informatización fue considerada un aspecto facilitador, ya que el registro manual ocasionaba lentitud del internet y sobrecarga de trabajo, además de las dificultades de trabajo para los digitadores. Se consideró esencial la colaboración de los equipos responsables en la consolidación de los datos en las Unidades Básicas de Salud. Fue reconocida la importancia de las informaciones para la gestión y atención al usuario70. | Local/Año: Zona da Mata/ Minas Gerais - 2010  Datos: entrevista con digitadores; 37 municipios |
| La implementación del SISVAN ocurrió después de la contratación del nutricionista y lectura de materiales temáticos, que fueron la base de las discusiones con la ESF y de los acuerdos con los gestores. Después de realizada sensibilización y capacitación de enfermeros, técnicos de enfermería, agentes administrativos, agentes comunitarios de salud y digitadores sobre SISVAN y ficha de marcadores de consumo, fueron elaborados materiales de apoyo y hubo aumento de la motivación para el desarrollo de las acciones, así como mejor división de las tareas98. | Local/Año: Juazeiro do Norte/Ceará – 2009-2010  Datos: relato de experiencia/1 Unidad de Salud de la Familia |
| Otras acciones | Se realizó evaluación del uso de indicadores antropométricos como predictores de riesgo cardiovascular para adultos mayores84.  Se desarrolló el cuestionario de frecuencia alimentar para mujeres embarazadas91.  Se discutió de la propuesta de una ficha antropométrica para uso de agentes comunitarios y profesionales de educación física119. | Descripción de los resultados de diversos artículos. Todos fueron desarrollados puntualmente para la realización del estudio. |
| Promoción de la Salud/ Alimentación adecuada y saludable | Incentivo | Consejería para adultos | Más del 30% de los entrevistados recibieron orientaciones sobre el consumo de sal, azúcar y grasas en Unidades Básicas de Salud, de las cuales el 72,0% fueron realizadas por médicos. Dichas orientaciones contribuyeron para mejorar la alimentación115. | Local/Año: Brasil – muestra nacional – 2008-2009  Datos: entrevista con 12.402 brasileños |
| Los comportamientos saludables fueron asociados a conocimientos previos y asistencia a consejerías impartidas por agentes comunitarios, no obstante, la mayoría no conoce las recomendaciones de alimentación ni los valores de corte del IMC59. | Local/Año: Brasil – muestra nacional - 2011  Datos: entrevista con 269 agentes comunitarios de salud |
| El 42,9% de los médicos, el 55,9% de los enfermeros y el 67,9% de los agentes comunitarios de salud se consideran poco preparados o con conocimientos medios para dar consejería sobre nutrición y el 25,8%, 39,8% y 53,8% respectivamente, para dar consejería sobre control de peso. Más de 90% de los médicos y enfermeros aconsejaban sobre alimentación saludable a personas con exceso de peso, perfil lipídico alterado, hipertensión y diabetes, no obstante, solamente el 30,8% y el 52,4%, respectivamente, aconsejaban a personas con cáncer de mama o cuello uterino66 | Local/Año: Brasil - 2011  Datos: entrevista con 798 profesionales de salud |
| El 87,2% de los individuos con hipertensión y 95,8% de las personas con diabetes atendidas en la APS recibieron orientaciones sobre el consumo de frutas y verduras y el 84,2% y 93%, respectivamente, sobre la manutención del peso adecuado. El 91,2% de las personas con hipertensión fue aconsejada sobre la reducción de la ingestión de sal y el 89,5% de estas con diabetes, fueron asesoradas sobre la reducción del consumo de carbohidratos121 | Local/Año: Brasil – muestra nacional - 2013  Datos: 11.455 entrevistas con personas con hipertensión y 3.255 con diabetes, muestra nacional |
| Se realizó consejería sobre estilos de vida saludables, alimentación y actividad física para el 40,8%y 51,1%76 de los usuarios, la mayoría realizada por médicos35,76 enfocada a mujeres y adultos35 y asociada a  Enfermedades crónicas no transmisibles, uso de medicamentos y Programa Gimnasio de la Salud76. | Local/Año: Belo Horizonte/ Minas Gerais - 201035;2009-201076  Datos: 417 usuarios; 1 Unidade Básica de Salud35 y 1616 usuarios; 4 Unidades Básicas de Salud76 |
| Consejería y recepción de embarazadas/Puérperas/Lactantes | El 47,0% de las madres de niños menores de seis meses reportaron no haber recibido orientaciones sobre lactancia materna en la primera consulta posparto y 38,8% no las recibieron después del parto87. | Local/Año: Rio de Janeiro/Rio de Janeiro - 2007  Datos: entrevista con 1.057 madres; 27 Unidades básicas de Salud |
| Solamente cinco de 22 mujeres, mencionaron haber recibido orientaciones sobre lactancia materna por parte de nutricionistas, médicos, educadores de niños o becarios en las Unidades Básicas de Salud102. | Local/Año: Viçosa/ Minas Gerais - 2010  Datos: entrevista con 22 madres; 1 Unidad básica de Salud |
| La mayor parte de los profesionales de salud refirió no haber participado de la capacitación u orientaciones donde puedieran expresar conocimientos de su propia vivencia, hubiera esclarecimiento de mitos y creencias por medio de los discursos de profesionales y lactantes. Hubo divergencia entre profesionales sobre uso de chupos y teteros y sobre la introducción de líquidos. Se mencionaron las orientaciones reducidas a acciones biologistas y verticales83. | Local/Año: Viçosa/Minas Gerais - 2007  Datos: entrevista con 58 madres lactantes y 32 profesionales de salud; 2 Unidades Básicas de Salud |
| Instalación de la Red Amamanta Brasil | En 58 talleres se formaron 1.415 tutores y 22.545 profesionales en 1.034 Unidades Básicas de Salud hasta el año 2010. Cuanto más favorable el contexto mayor fue el grado de afianzamiento de la red, el apoyo de la gestión, el aporte financiero, los recursos humanos calificados, la autonomía del coordinador, la prorización en los planes de salud privados, la inexistencia de acciones competitivas y la articulación con otras áreas. Los municipios de menor tamaño y uso de Sisvan-Web favorecieron la creación de Unidades126. | Local/Año: Brasil - 2010  Datos: evaluación en 36 Unidades Básicas de Salud, 3 municipios, sus respectivos estados y el Gobierno Federal |
| *Brasil:* Las Unidades Básicas de Salud certificadas presentaron mejor desempeño en las acciones previstas por la Red Amamanta Brasil en comparación con las que no habían realizado el taller, no obstante, se identificaron fallas en las acciones obligatorias en algunas de las certificadas. Hubo tendencia de aumento de la lactancia materna exclusiva en menores de seis meses con el consecuente aumento de los criterios de certificación. La misma tendencia no ocurrió en relación a la lactancia materna de niños de 9 a 12 meses127. | Local/Año: 3 municipios – 2012-2013  Datos: evaluación de 56 Unidades Básicas de Salud; 1.052 niños menores de un año |
| El grado de afianzamiento de la Red impactó significativamente en el aumento de la lactancia materna exclusiva, aumentando progresivamente en Unidades Básicas de Salud que no realizaron los talleres, se realizaron talleres certificados en la red95. | Local/Año: Ribeirão Preto/São Paulo - 2011  Datos: 916 niños menores de 6 años, usuarias de la red privada y de 40 Unidades Básicas de Salud |
| No encontraron diferencias entre la prevalencia de lactancia materna de niños acompañados por las Unidades Básicas de Salud adheridas o no a la Red41. | Local/Año: Bento Gonçalves/ Rio Grande do Sul - 2012  Datos: 405 niños menores de un año participantes de campañas de vacunación |
| PAAS | Incentivo | Evaluación del impacto y efectividad de acciones realizadas por las universidades en la APS | Se prestó acompañamiento, por un periodo de 6 meses a mujeres divididas en grupos de control (rutina de APS – actividad física 3 veces por semana, grupos de EAN mensuales y atención individual en casos de exceso de peso y enfermedades crónicas no transmisibles estables) e intervención (modelo transteórico – subdivisión por etapas de mudanza, actividades de rutina asociadas a 10 talleres conducidos por equipos multidisciplinarios). Se constataron mejoras en las medidas antropométricas y nutricionales en el grupo de intervención85. | Local/Año: Belo Horizonte/ Minas Gerais - 2013  Datos: 71 mujeres del programa Gimnasio de la Salud |
| *Belo Horizonte/MG:* Se prestó acompañamiento mensual, por un periodo de 6 meses, por parte de especialistas en nutrición y equipos de educación física, quienes impartieron orientaciones nutricionales, basadas en guías y manuales oficiales y actividad física 3 veces por semana. Se reportaron modificaciones positivas en la alimentación y en las medidas antropométricas77. | Local/Año: Belo Horizonte/ Minas Gerais - 2007  Datos: 20 adultos y adultos mayores del Programa Gimnasio de la Ciudad |
| Se realizaron cursos y talleres para 22 profesionales de la salud (16 horas, 8 meses) sobre alimentación saludable y sus determinantes, ganancia de peso, uso del modelo transteórico y la oferta de materiales de apoyo para consejería. Se realizó comparación con 20 profesionales de otras Unidades Básicas de Salud y no se identificaron diferencias en el conocimiento previo de los grupos, las mujeres embarazadas atendidas por el grupo de intervención fueron más propensas a recibir orientación sobre alimentación saludable79. | Local/Año: São Paulo/ São Paulo - 2012-2014  Datos: 42 profesionales de la salud, 281 mujeres embarazadas; 17 Unidades Básicas de Salud |
| Educación en Salud con adolescentes | Se realizaron actividades colectivas sobre lactancia materna antes de las consultas de puericultura. Hubo falta de recursos didático y pedagógicos. Se elaboraron actividades mensuales o quincenales con temas variados, seleccionados por beneficiarios del Programa de transferencia de ingresos, en los que hubo disponibilidad de materiales de apoyo | Local/Año: Vitória/Espírito Santo - 2007  Datos: evaluación de 6 Unidades Básicas de Salud |
| Apoyo | Se realizó capacitación de los profesionales, lo que motivó la articulación con bancos de leche humana y la mejor estructuración para la extracción de leche materna en las Unidades de Salud. Hubo identificación continua de donantes, divulgación, realización de talleres y apoyo domiciliario. Las acciones estuvieron basadas en las necesidades y valoración del conocimiento de posibles donantes y lactantes97. | | Local/Año: Rio de Janeiro/ Rio de Janeiro – 2011-2013  Datos: relato de experiencia – 1 Unidad Basica de Salud |
| Prevención de enfermedades y daños relacionados a la AyN | Educación alimentaria y nutricional (EAN) | Evaluación del impacto y efectividad de acciones de EAN para prevención de ganancia/Exceso de peso/ Enfermedad crónica | Hubo acompañamiento de mujeres embarazadas en el grupo de intervención (orientaciones alimenticias a partir del estado nutricional y entrega de valores y medidas caseras) y control (evaluación del estado nutricional y orientación para informar resultados en el control de embarazo). La intervención fue efectiva en la reducción de la ganancia de peso semanal y la prevalencia de interacciones clínicas129. | Local/Año: Porto Alegre/Rio Grande do Sul – 2007-2008  Datos: 215 mujeres embarazadas; 1 Unidad Básica de Salud |
| Se realizó intervención 3 veces por semana, durante 11 meses, en mujeres clasificadas en grupos de actividad física, participación insatisfactoria y participación satisfactoria en las intervenciones nutricionales (grupos mensuales de EAN, con uso de materiales lúdicos, basados en conocimientos previos y dudas de las participantes). Se reportaron mayores mejorías en el grupo de participación satisfactoria52. | Local/Año: Belo Horizonte/ Minas Gerais - 2011  Datos: 124 mujeres |
| Prevención de caries en preescolares | Se realizó capacitación de profesionales, exposición de carteles y distribución de panfletos para usuarias de nueve Unidades Básicas de Salud que incluían informaciones sobre alimentación saludable. Se identificó un efecto protector para el desarrollo de caries precoz severa entre los niños que permanecieron en la misma Unidad Básica de Salud en el periodo estudiado y cuando la Unidad Básica de Salud era la única fuente de información sobre alimentación49. | Local/Año: Porto Alegre/Rio Grande do Sul - 2008  Datos: 458 niños; 20 Unidades Básica de Salud |
| Hubo capacitación de los profesionales, observación previa de los hábitos de los niños, desarrollo de acciones lúdicas que incluian temas sobre alimentación saludable, demostración de higiene bucal y remoción de la placa bacteriana y supervisión del cepillado de dientes en una escuela del territorio. Se verificaron mejoras en la salud bucal después de la intervención39. | Local/Año: Porto Alegre/Rio Grande do Sul - 2010  Datos: 41 niños |
| Suplemento con micronutrientes | Evaluación de la efectividad de los suplementos | Niños entre 6 y 8 meses recibieron micronutrientes en polvo por 60 días y niños de 10 a 14 meses fueron reclutados para evaluación de anemia y estado antropométrico y nutricional. Después de la intervención, se observó que el uso de micronutrientes fue efectivo para reducir la anemia y mejorar el crecimiento y el estado nutricional de los niños46. | Local/Año:3 municipios de gran tamaño e 1 de medio tamaño – 2012-2013  Datos: 983 niños; 24 Unidades Básicas de Salud |
| Se estudiaron niños divididos en dos grupos, uno que recibía el suplemento diario de sulfato ferroso recomendado por la Sociedad Brasileña de Pediatría y otro con dosis semanal recomendado por el Ministerio de Salud. Hubo mayor reducción de los niveles de hemoglobina entre los niños que consumían el suplemento diariamente38. | Local/Año:Viçosa/ Minas Gerais – 2007-2008  Datos: 103 lactantes no anémicos |
| Suplementos con micronutrientes | Evaluación de la implementa ción del Programa Nacional de Suplemento de Vitamina A | Se verificó el adecuado almacenamiento de los insumos (57,2%), los conocimiento de los materiales del programa (74,4%) y la regularidad recomendada (91,0%), los suplementos semanales y trimestrales (67,4%), la buena adhesión de las familias (55,0%), la identificación de la población por demanda espontánea, la búsqueda activa en campañas de vacunación y el desarrollo de acciones para la comunidad. Se evidenció falta de materiales (70,3%) y de capacitación (60,5%) e irregularidades en la adquisición (23,4%) y la aplicación de los suplementos (24,5%). El 24,1% de los niños nunca habían consumido suplementos y 72,4% al menos una vez, a pesar de lo cual el 74,3% no consumia hacía más de seis meses, representando discontinuidad en la cobertura93. | Local/Año: tres municipios/ Paraíba - 2007  Datos: entrevistas con responsables de programas o aplicación de suplemento; análisis de cartillas de 1.211 niños; 47 Unidades Básicas de Salud |
| Asisten cia y trata  miento de enfermedades y daños rela  cionados con la AyN | Diabetes | Intervenciones realizadas por universidades | Se contó con grupos, cada tres meses, que trataban temas sobre enfermedades, alimentación, práctica de actividad física y cuestiones psicológicas. Se realizó monitoreo telefónico entre los encuentros presenciales, refuerzo de informaciones y apoyo ante dificultades y metas122. | Local/Año: Belo Horizonte/ Minas Gerais - 2010  Datos: 115 usuarios; 4 Unidades Básicas de Salud |
| Hubo grupos educativos de 12 semanas con grupos de 12 integrantes, en los que se abordaron temáticas del cuerpo y la diabetes, la alimentación y la actividad física, los tratamientos medicamentosos, el monitoreo de la glucosa y el alcance de metas. Sin analizar el impacto de la intervención, se observó que la alimentación, la evaluación de la glucosa en sangre, el secado de pies y uso de medicamentos eran realizados dentro de los patrones adecuados, sin embargo, se identificaron dificultades para el seguimiento del plan alimentario128. | Local/Año: Ribeirão Preto/ São Paulo - 2012  Datos: 72 usuarios; 2 Unidades Básicas de Salud |
| Adhesión y Tratamiento | Se reportó que apenas un 1,4% de los sujetos se adherían al tratamiento completo (medicamentoso, alimenticio y con práctica de actividad física); 1,7% al medicamentoso y plan alimenticio y 6,2% seguían las orientaciones dietéticas. En más de la mitad de las Unidades Básicas de Salud (52,9%) no hubo adhesión al plan de alimentación, siendo este uno de los mayores desafíos para los equipos55. | Local/Año: Passos/ Minas Gerais - 2010  Datos: 423 usuarios; 17 Unidades Básicas de Salud |
| Se identificó que los médicos tendian a superestimar el riesgo de complicaciones y a subestimar la adhesión de los usuarios al tratamiento. Todos los pacientes refirieron haber recibido consejería dietética. La concordancia sobre la adhesión fue de 78,2%58. | Local/Año: Belo Horizonte/ Minas Gerais - 2011  Datos: 283 parejas pacientes-médicos; 108 Unidades básicas de Salud |
| Hipertensión | Intervenciones realizadas por universidades | Se realizó acompañamiento de adultos y adultos mayores durate 6 meses. Se conformaron grupos control (rutina de las Unidades Básicas de Salud y orientaciones sobre dieta con baja ingesta de sodio y tratamiento medicamentoso) e intervención (orientaciones mensuales por nutricionistas). Hubo mejoras significativas en el grupo intervención 74. | Local/Año: São Luís/ Maranhão – 2010-2011  Datos: 156 sujetos; 2 Unidades Básicas de Salud; |
| Se realizó acompañamiento de mujeres subdivididas en dos grupos, uno que recibió 5 talleres manuales con charlas que utilizaron recursos lúdicos, y otro, en que además de los talleres, se realizaron 5 visitas domiciliarias. Las orientaciones con visitas domiciliares resultaron positivas en términos de mayor adhesión a los cambios de hábitos alimenticios y mejora en los parámetros dietéticos, antropométricos, bioquímicos y clínicos105. Estrategias como las utilizadas, mejoraron la autopercepción, concientización y comprehensión sobre el tratamiento dietético. Las modificaciones en los hábitos alimenticios fueron influenciadas por la presencia del nutricionista y las demostraciones prácticas103. La adhesión fue influenciada negativamente por la falta de apoyo familiar, la hegemonía médica y en el carácter prescriptivo de las consultas, y positivamente por el acceso a información, el soporte social y las estrategias educativas empleadas por equipos multidisciplinarios104. | Local/Año: Passo Firme/ Minas Gerais - 2009  Datos: intervención, entrevistas y grupos focales; 28 mujeres |
| Síndrome Metabólico | Adhesión y Tratamiento | El66,1% de los adultos mayores no se adherían al tratamiento dietético prescrito en la APS. La adhesión fue más frecuente (mayor del 70%) para la reducción del consumo de sal, el aumento del consumo de frutas, verduras y pescado y evitar fiambres, azúcar, dulces y grasas. Los principales motivos para la no adhesión, fueron la falta de persistencia, aspectos de sabor o textura de la dieta y no considerar el tratamiento necesario. La depresión fue asociada con la dificultad para evitar dulces y azúcares69. | Local/Año: Porto Alegres/ Rio Grande do Sul - 2012  Datos: 109 adultos mayores, 19 Unidades Básicas de Salud |
